# Supplementary material
Source: publisher figshare collection journal article supplement (https://asha.figshare.com/articles/dataset/_/8636948)

**Supplemental Material S2.** Survey given to participants with motor impairment following each block of interaction with the interface.

**New AAC interface follow-up**

*Asked to the person who uses AAC; answers indicated via typical communication modality or by a communication partner slowly moving from left to right with the user indicating where to make a mark*

How usable was this interface?

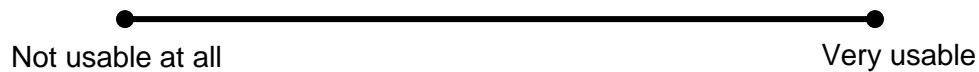

How intuitive was this interface?

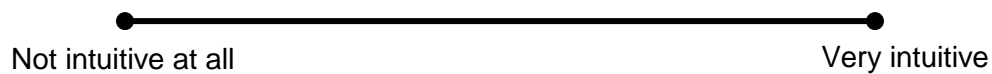

How easy was it to understand the layout?

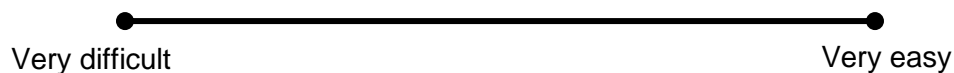

Do you think you could improve with practice?

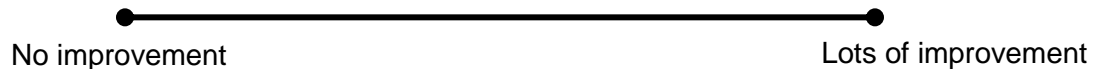

Could you find the letters/phonemes you wanted easily?

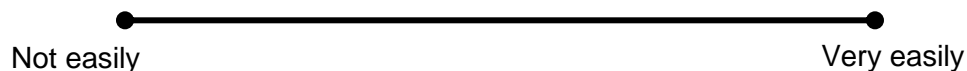

Could you find all of the symbols you wanted to use?

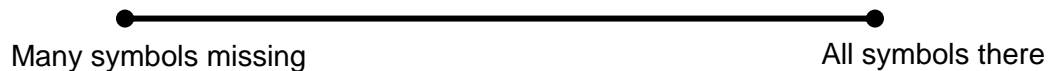

Was using the interface frustrating?

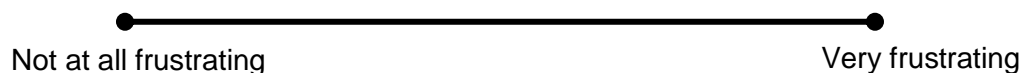

Did using the interface feel fast?

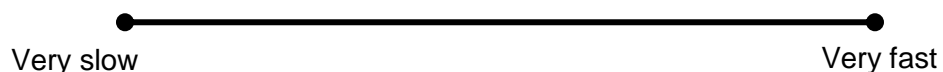

**Supplemental Material S2.** Survey given to participants with motor impairment following each block of interaction with the interface.

How difficult was it to learn to use your CURRENT method of communication?

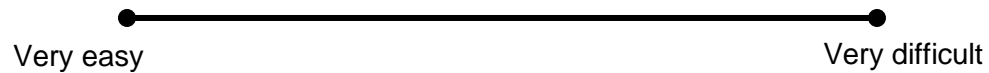

How difficult was it to learn to use this new method of communication?

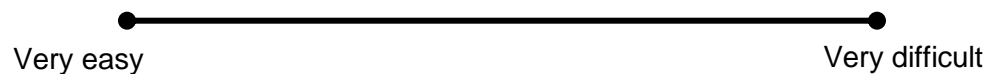

I preferred the interface:

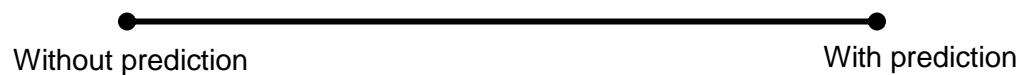

I thought the enlarged targets:

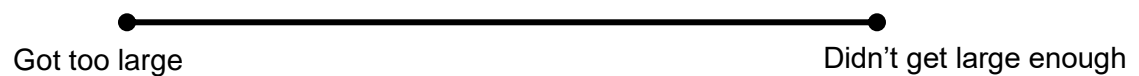

I thought the enlarged targets:

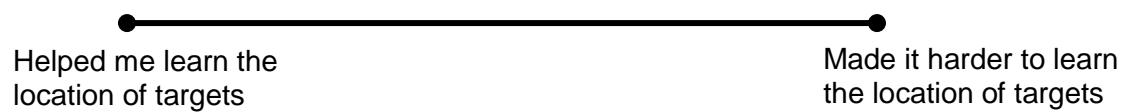

Supplement: Supplementary file 1 [file 1]
